# Supplementary material
Source: publisher figshare collection journal article supplement (https://frontiersin.figshare.com/ndownloader/files/29098590)
Supplement: Supplementary file [file 29098590]

**S1 Fig: A brief flow chart of the BLI experiment.**

Buffer: PBS buffer of pH 6.5; His-tagged: His-tag IGBP recombinant protein, including original protein and amino acid site-directed mutant protein; Buffer 2: The buffer 2 used was PBS containing 0.1% bovine serum albumin and 0.02% Tween-20, pH 6.5; Rutin: Rutin is dissolved in buffer 2.

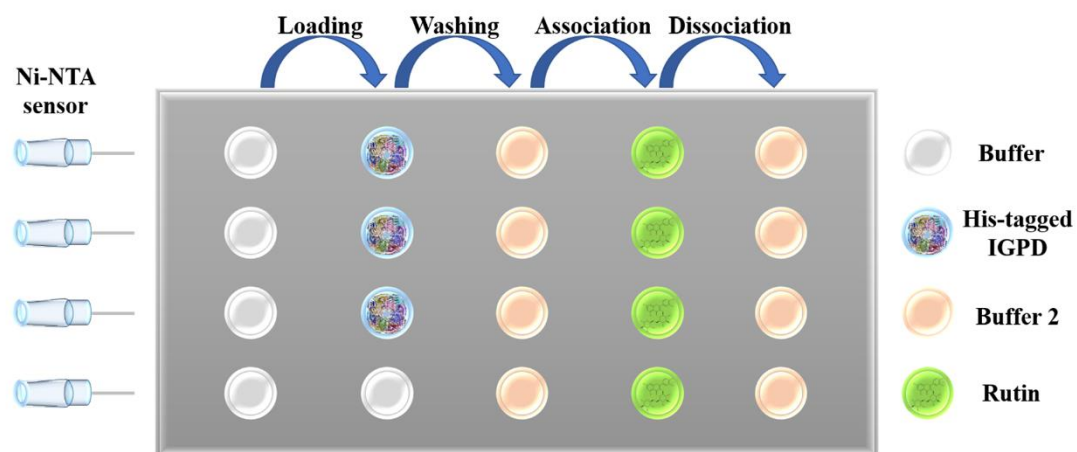

## S2 Fig: The molecular dynamics (MD) simulation of the IGPD/rutin complex.

The root-mean-square deviation (RMSD) calculated for the backbone atoms of the protein during MD simulation.

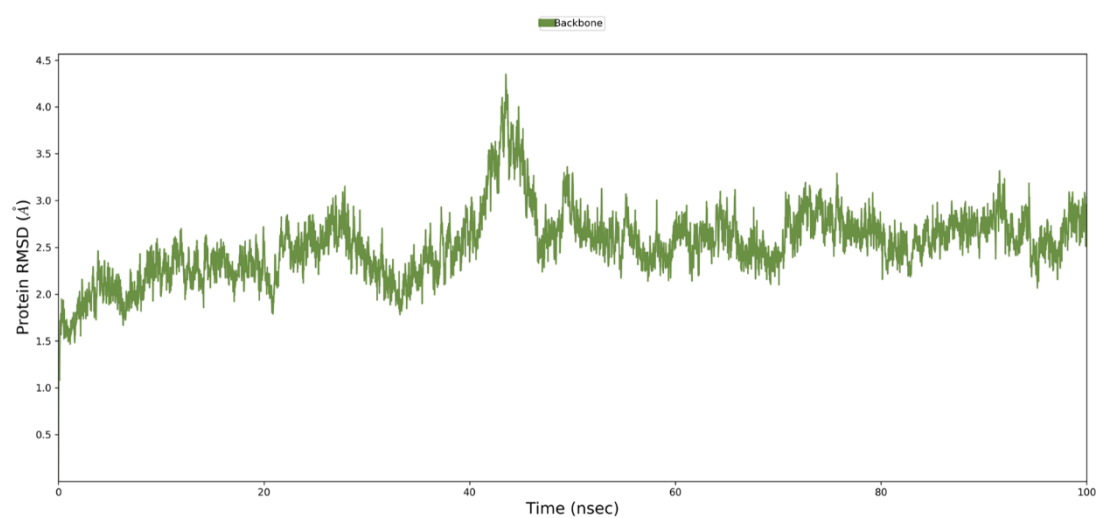

**S3 Fig: A representative sequencing chromatogram of nine IGPD mutant proteins. The IGPD sequence of wild type was used as control.**

**A:** Sequencing results of pET30a-Ala7. **B:** Sequencing results of pET30a-Ala62. **C:** Sequencing results of pET30a-Ala63. **D:** Sequencing results of pET30a-Ala66. **E:** Sequencing results of pET30a-Ala97. **F:** Sequencing results of pET30a-Ala110. **G:** Sequencing results of pET30a-Ala159. **H:** Sequencing results of pET30a-Ala162. **I:** Sequencing results of pET30a-Ala166.

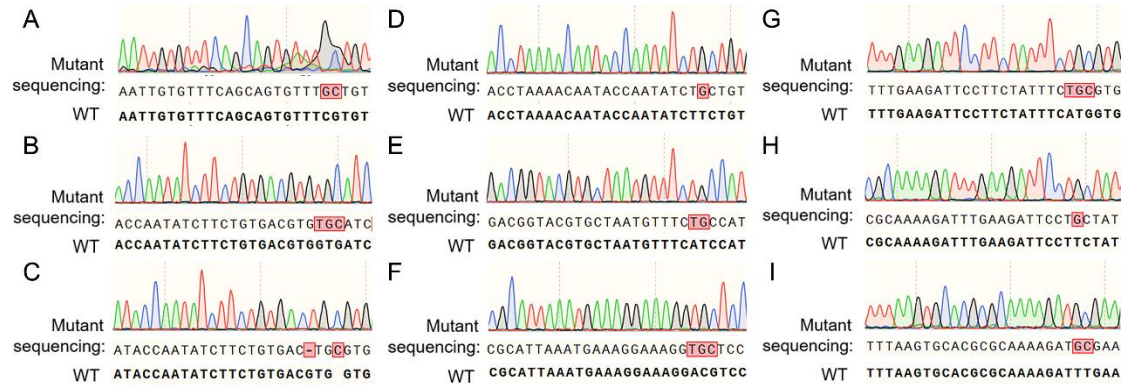

**S4 Fig: SDS-PAGE gel analysis of IGPD and its mutant proteins expression as induced by the presence or absence IPTG.**

Lane 1: Protein molecular mass marker; lane 2: The lysates of BL21 (DE3) cells containing pET30a-IGPD without IPTG; Lane 3: The lysates of BL21 (DE3) cells containing pET30a-IGPD with IPTG; Lane 4: The supernatants of BL21 (DE3) cells containing pET30a-IGPD with IPTG; Lane 5: The precipitates of BL21 (DE3) cells containing pET30a-IGPD with IPTG. **A:** IGPD. **B:** IGPD  $\Delta$ Arg7. **C:** IGPD  $\Delta$ His62. **D:** IGPD  $\Delta$ His63. **E:** IGPD  $\Delta$ Glu66. **F:** IGPD  $\Delta$ Asp97. **G:** IGPD  $\Delta$ Arg110. **H:** IGPD  $\Delta$ His159. **I:** IGPD  $\Delta$ Glu162. **J:** IGPD  $\Delta$ Lys166.

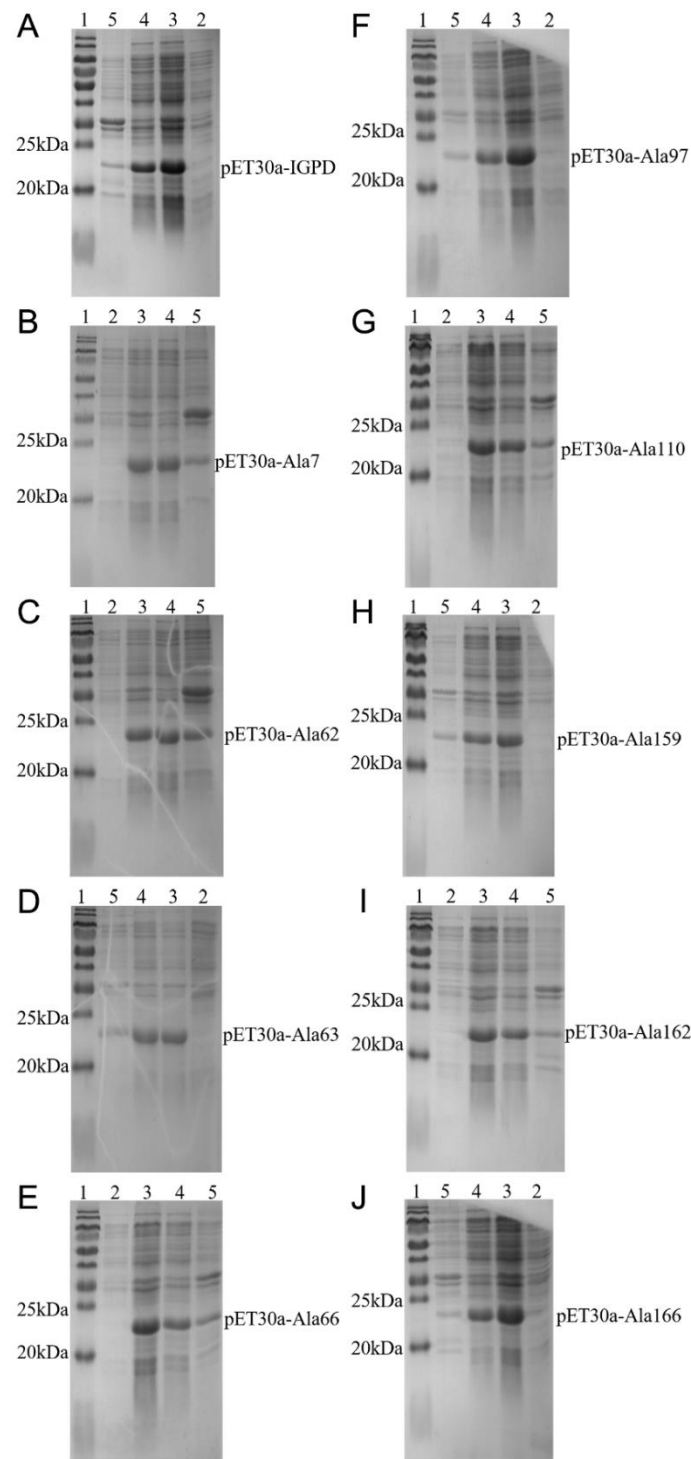

**S5 Fig: AKTA purified protein absorption curve of IGPD and its mutant proteins.**

**A:** IGPD. **B:** IGPD  $\Delta$ Arg7. **C:** IGPD  $\Delta$ His62. **D:** IGPD  $\Delta$ His63. **E:** IGPD  $\Delta$ Glu66. **F:** IGPD  $\Delta$ Asp97. **G:** IGPD  $\Delta$ Arg110. **H:** IGPD  $\Delta$ His159. **I:** IGPD  $\Delta$ Glu162. **J:** IGPD  $\Delta$ Lys166.

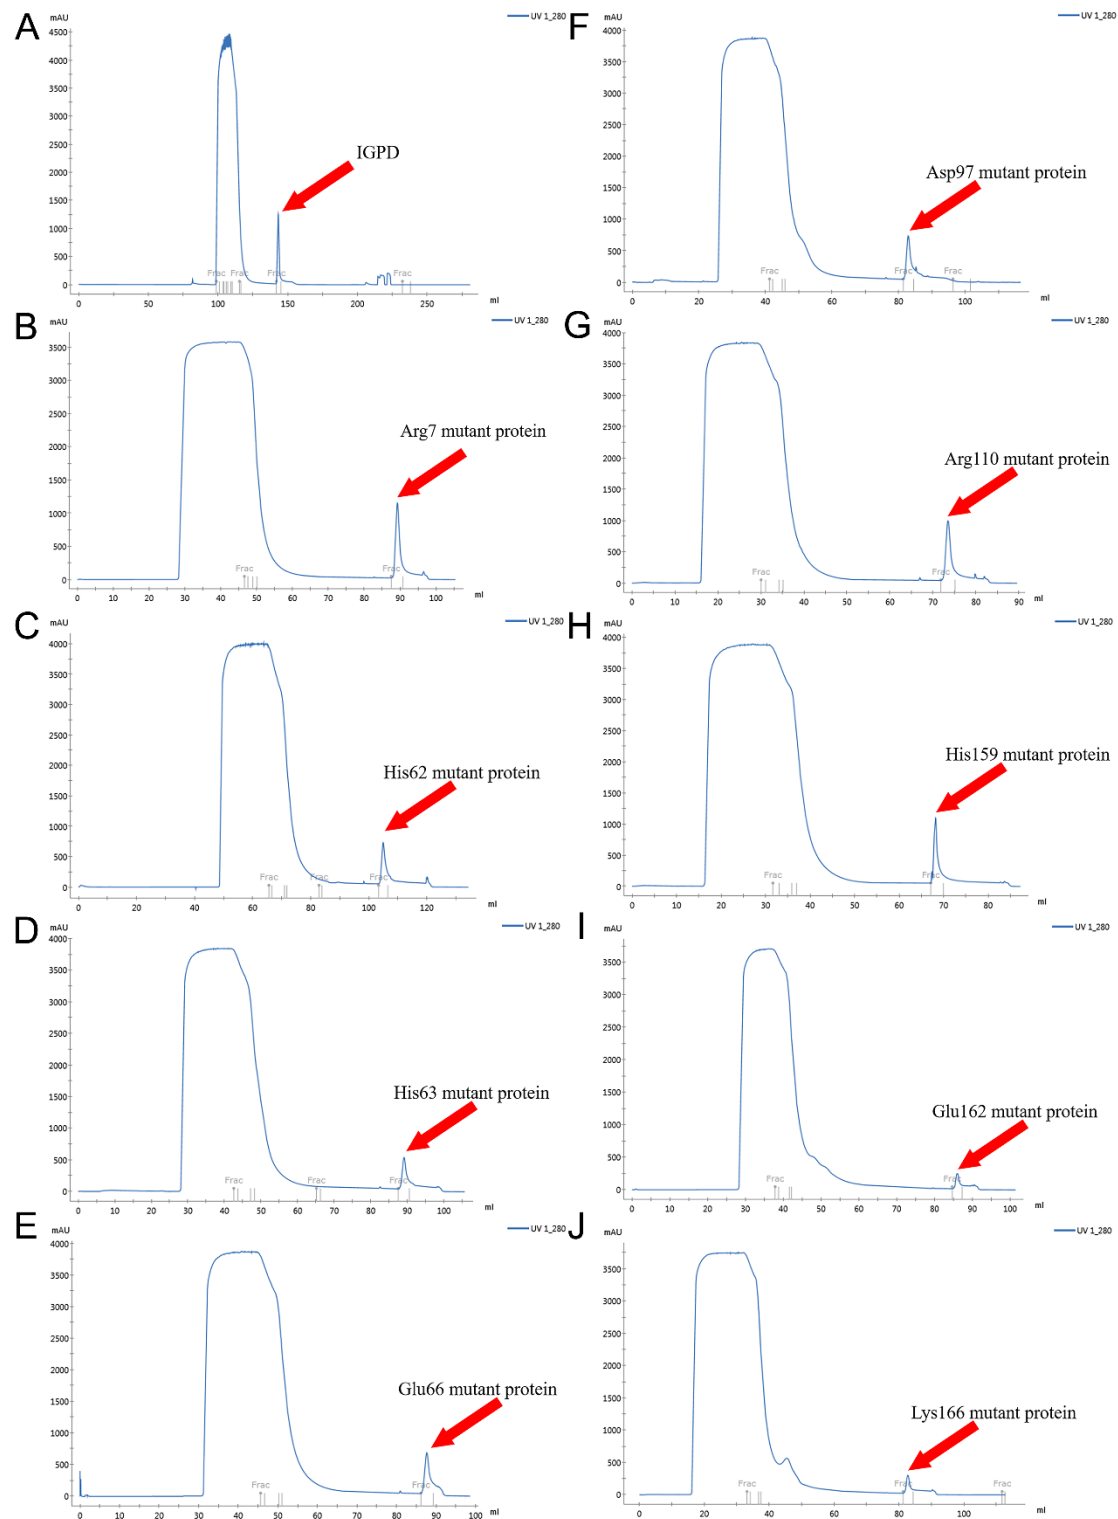

## S6 Fig: Interaction between rutin and mutant protein.

**A:** Interaction between IGPD  $\Delta$ Arg7 and rutin. **B:** Interaction between IGPD  $\Delta$ His63 and rutin. **C:** Interaction between IGPD  $\Delta$ Glu66 and rutin. **D:** Interaction between IGPD  $\Delta$ Asp97 and rutin. **E:** Interaction between IGPD  $\Delta$ Arg110 and rutin. **F:** Interaction between IGPD  $\Delta$ His159 and rutin. **G:** Interaction between IGPD  $\Delta$ Glu162 and rutin. **H:** Interaction between IGPD  $\Delta$ Lys166 and rutin.

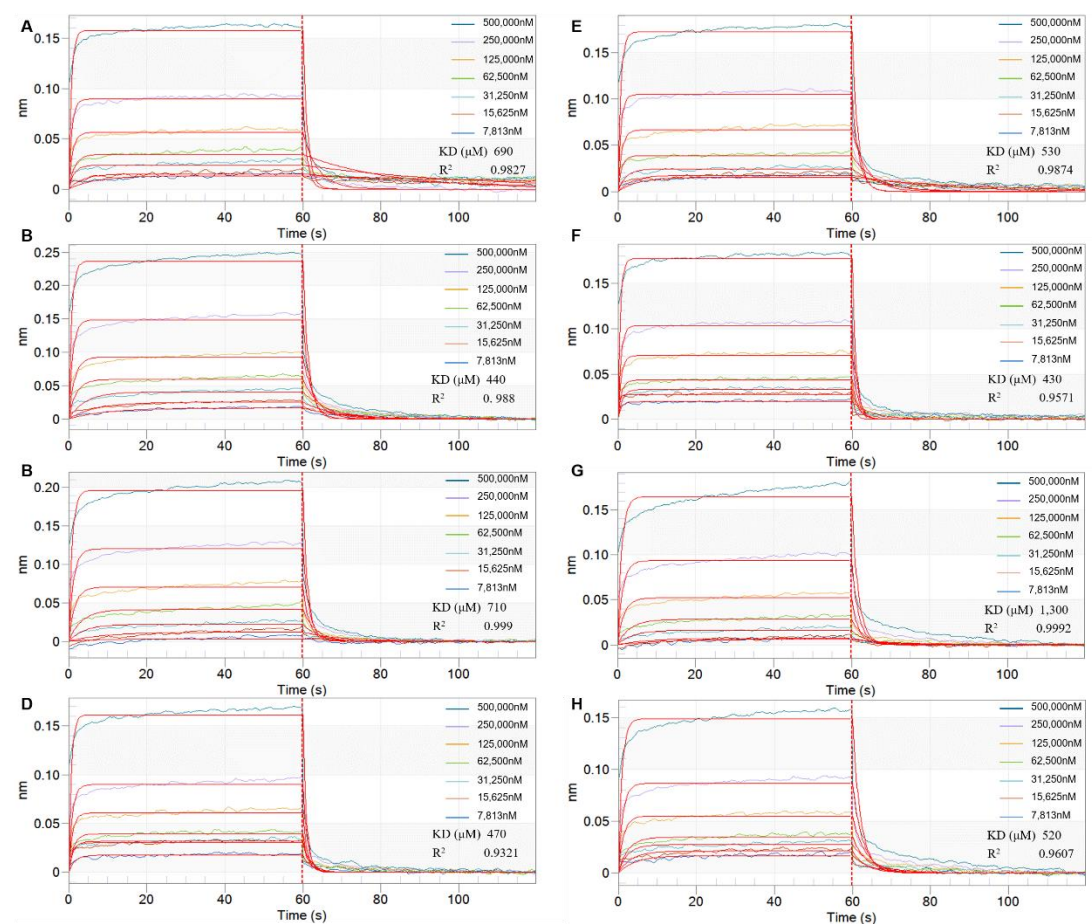

## Original images for blots

**Fig. 3\_B\_raw\_images**

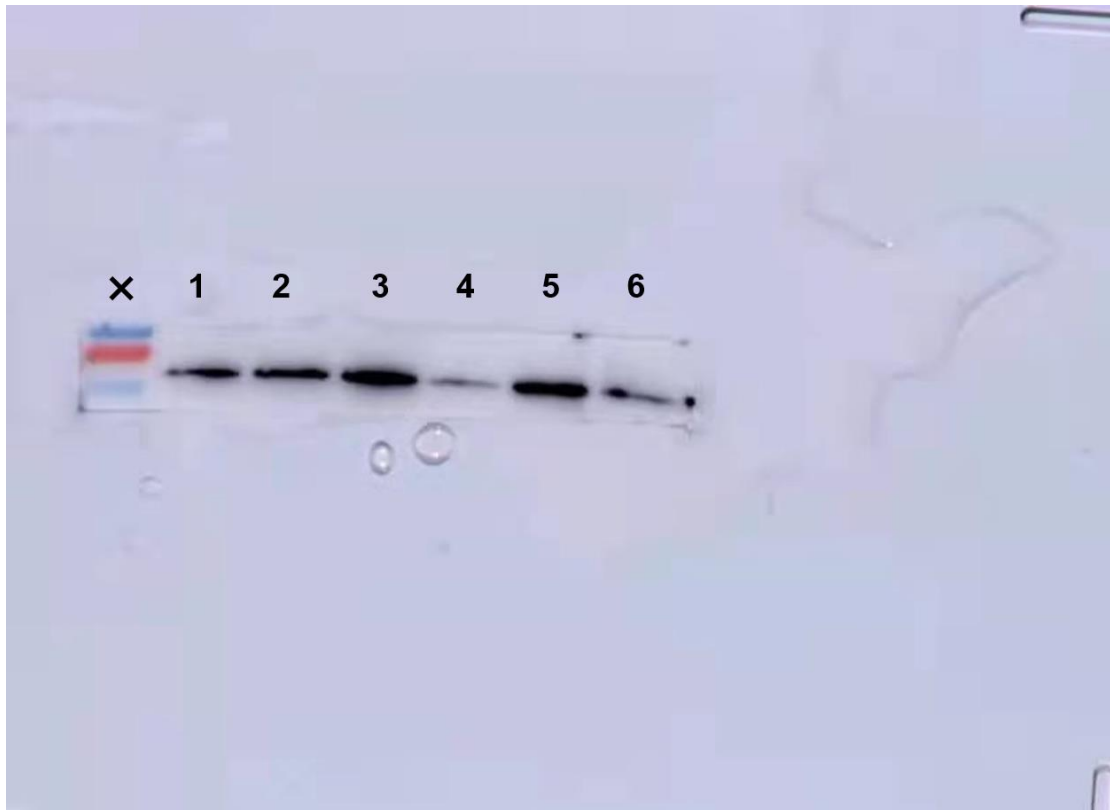

**The effect of rutin on the expression of IGPD protein in *S. xylosus* at 6, 12, and 24 h, respectively.** Line 1: 6 h without rutin; Line 2: 6 h with rutin; Line 3: 12 h without rutin; Line 4: 12 h with rutin; Line 5: 24 h without rutin; Line 6: 24 h with rutin.
